# Supplementary material for: Position Estimation Based on Grid Cells and Self-Growing Self-Organizing Map
Source: Comput Intell Neurosci. 2019 Feb 26;2019:3606397. doi: 10.1155/2019/3606397 (PMC6413409; doi:10.1155/2019/3606397)
Supplement: Supplementary Materials — The self-organizing map introduced in this paper is a Kohonen self-organizing map, which is also named as Kohonen feature map [27]. It is an unsupervised, competitive feed-forward neural network. SOM can map high-dimensional data into one- or two-dimensional data keeping the same topological order as the original data, and then features of the input data will be visualized. Thus, SOM is an effective method for feature extraction and dimensionality reduction and usually used for classification or prediction of different problems. Traditional SOM network consists of two layers: input layer and competitive layer which is also called output layer. The number of input layer nodes is equal to the input vector's dimension. The number of competitive layer neurons is fixed, and the neurons are usually arranged in a two-dimensional rectangle or hexagon grid. Each neuron of the competitive layer contains a weight vector that has the same dimension as the input vector. The whole network works as follows. When an input sample vector is put into the network, the Euclidean distance between this vector and weight vectors of the competitive layer neurons is calculated to obtain the winning neuron which has the minimum distance. Then, the weight vectors of the winning neuron and its neighboring neurons are adjusted to make them more similar to the input sample vector. Eventually, the weight vectors of competitive layer neurons have a certain distribution as input sample vectors by such training. [file 3606397.f1.zip › 3606397.f1/xy_to_vector_mod.m]

function [vector ] = xy_to_vector_mod( x,y,T1,T2,T3,D )
%%%%%%%%%%%%%%%%%%%%%%%%%%%%%%%%%%%%%%
    xx=x-y/tan(pi/3);
    yy=y/sin(pi/3);
    rx1=mod(xx,T1);
    rx1=round(rx1/D);
    rx2=mod(xx,T2);
    rx2=round(rx2/D);
    rx3=mod(xx,T3);
    rx3=round(rx3/D);
    rx=[rx1,rx2,rx3];
    ry1=mod(yy,T1);
    ry1=round(ry1/D);
    ry2=mod(yy,T2);
    ry2=round(ry2/D);
    ry3=mod(yy,T3);
    ry3=round(ry3/D);
    ry=[ry1,ry2,ry3];
    vector=[rx,ry];
end
